# Supplementary material
Source: HighWire-hosted journal article supplement (https://militaryhealth.bmj.com/highwire/filestream/158928/field_highwire_adjunct_files/0/military-2022-002238supp001_data_supplement.pdf)

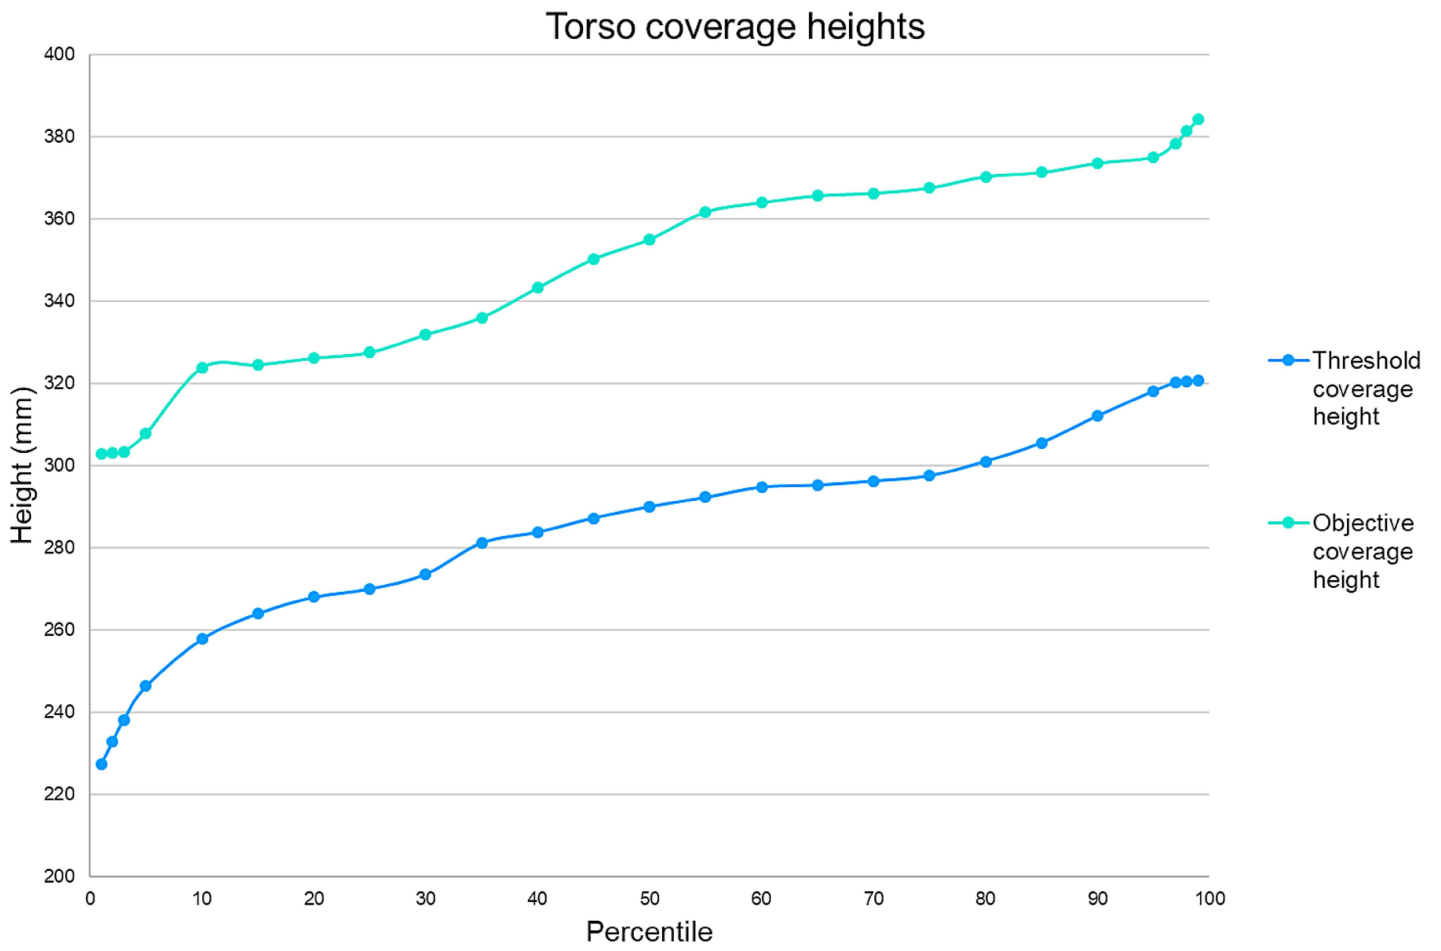

Supplement: military-2022-002238supp001_data_supplement.pdf [file military-2022-002238supp001_data_supplement.pdf]
